# Supplementary material for: Synthesis of high-molecular-weight poly(ε-caprolactone) catalyzed by highly active bis(amidinate) tin(ii) complexes
Source: Royal Society of Chemistry journal article supplement (doi:10.1039/c0dt01050b), 2010-12-01
Supplement: c0dt01050b.pdf [file c0dt01050b.pdf]

*Electronic Supplementary Information for*

**Synthesis of High-Molecular-Weight Poly( $\epsilon$ -Caprolactone) Catalyzed by Highly  
Active Bis(amidinate) Tin(II) Complexes**

**Khampee Phomphrai,\* Chatyapha Pongchan-o, Wipavee Thumrongpatanaraks,  
Preeyanuch Sangtrirutnugul, Palangpon Kongsaree, and Manat Pohmakotr**

Center for Catalysis, Department of Chemistry and Center for Innovation in Chemistry,

Faculty of Science, Mahidol University, Rama 6 Road, Bangkok 10400 Thailand.

Fax: +662-354-7151; Tel: +662-201-5146; E-mail: [skpp@mahidol.ac.th](mailto:skpp@mahidol.ac.th)

## Experimental Section

**General Details.** All operations were carried out under dry argon atmosphere using standard Schlenk techniques. Benzene, n-hexane, and toluene were dried using PURE SOLV MD-5 solvent purification system from Innovative Technology Inc. All amidine ligands, *N,N'*-diphenylformamidine (**1a**), *N,N'*-bis(4-methoxyphenyl)formamidine (**1b**), *N,N'*-bis(4-(trifluoromethyl)phenyl)formamidine (**1c**), *N,N'*-bis(2,6-dimethylphenyl)formamidine (**1d**), and *N,N'*-bis(2,6-diisopropylphenyl) formamidine (**1e**) were synthesized according to literature procedures.<sup>1</sup> Sn[N(SiMe<sub>3</sub>)<sub>2</sub>]<sub>2</sub> was synthesized according to literature procedure.<sup>2</sup> ε-Caprolactone (ε-CL) was purchased from Aldrich, dried over CaH<sub>2</sub> and distilled prior to use.

**Measurements.** <sup>1</sup>H and <sup>13</sup>C{<sup>1</sup>H} NMR spectra were recorded on a Bruker DPX-300 or AVANCE 500 spectrometer and referenced to protio impurity of commercial chloroform-*d* (CDCl<sub>3</sub>, δ 7.26 ppm) or benzene-*d*<sub>6</sub> (C<sub>6</sub>D<sub>6</sub>, δ 7.16 ppm) as internal standards. Elemental analyses were performed on a Perkin Elmer 2400 CHN. X-ray crystallography data was collected at 293K on a Bruker SMART CCD area-detector diffractometer using graphite-monochromated Mo Kα radiation (λ = 0.71073 Å). MALDI-TOF mass spectrometry was carried out using a Bruker Daltonics flexAnalysis mass spectrometer. Spectra were recorded in reflector mode at an acceleration voltage of 19 kV and the delay time was 400 ns. The data was reprocessed using the Bruker XTOF software. Gel permeation chromatography (GPC) analyses were carried out on a Waters e2695 instrument equipped with Model 3580 refractive index detectors (Viscotek) and two 10 μm PL Gel columns. The GPC columns were eluted using tetrahydrofuran with flow rate of 1.0 mL/min at 35 °C. Molecular weights and molecular weight distributions were calibrated with polystyrene standards ranging from 500 to 10,000,000 amu. Water contact angles were measured using a home-made apparatus equipped with a syringe needle to dispense

a water drop onto the surface. The average of at least three separate advancing contact angle measurements was determined. The contact angle of the water drop on the polymer surface was observed by CCD camera connected to a computer.

**Synthesis of bis(amidinate)tin(II) complexes.** A general synthetic procedure is described in Scheme S1. The following representative procedure is for complex **2a**. Other tin(II) complexes were synthesized similarly.

To a mixture of ligand **1a** (0.66 g, 3.36 mmol) and  $\text{Sn}[\text{N}(\text{SiMe}_3)_2]_2$  (0.74 g, 1.68 mmol) was added 20 mL toluene. The reaction was allowed to stir at 70 °C overnight. After solvent removal, the product was obtained as a pale yellow microcrystalline (0.86 g, 1.68 mmol, >99%).

**Scheme S1.** Synthetic procedure for bis(amidinate) tin(II) complexes **2a–e**.

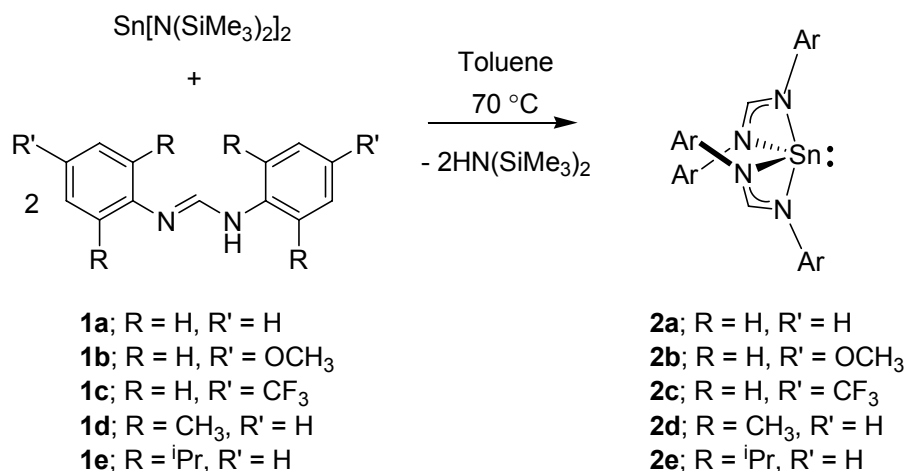

**[(C<sub>6</sub>H<sub>5</sub>N)<sub>2</sub>CH]<sub>2</sub>Sn (**2a**)** A pale yellow microcrystalline (>99%). <sup>1</sup>H NMR (300 MHz, C<sub>6</sub>D<sub>6</sub>): δ 8.69 (s, 2H, N=CH), 7.06 (t, <sup>3</sup>J<sub>HH</sub> = 7.8 Hz, 8H, *m*-C<sub>6</sub>H<sub>5</sub>), 6.88 (t, <sup>3</sup>J<sub>HH</sub> = 7.3 Hz, 4H, *p*-C<sub>6</sub>H<sub>5</sub>), 6.80 (d, <sup>3</sup>J<sub>HH</sub> = 7.6 Hz, 8H, *o*-C<sub>6</sub>H<sub>5</sub>). <sup>13</sup>C{<sup>1</sup>H} NMR (75 MHz, C<sub>6</sub>D<sub>6</sub>): δ 157.0 (HC(N(C<sub>6</sub>H<sub>3</sub>))<sub>2</sub>), 146.2 (*ipso*-C), 129.2 (*m*-C), 123.1 (*p*-C), 120.6 (*o*-C). Anal. Calcd for C<sub>26</sub>H<sub>22</sub>N<sub>4</sub>Sn: C, 61.33; H, 4.35; N, 11.00. Found: C, 61.50; H, 4.63; N, 10.99.

**[(((4-CH<sub>3</sub>O)C<sub>6</sub>H<sub>4</sub>)N)<sub>2</sub>CH]<sub>2</sub>Sn (2b)** A dark-green microcrystalline (81%). <sup>1</sup>H NMR (300 MHz, C<sub>6</sub>D<sub>6</sub>): δ 8.77 (*s*, 2H, N=CH), 6.83 (*d*, <sup>3</sup>J<sub>HH</sub> = 8.7 Hz, 8H, C<sub>6</sub>H<sub>4</sub>), 6.74 (*d*, <sup>3</sup>J<sub>HH</sub> = 8.8 Hz, 8H, C<sub>6</sub>H<sub>4</sub>), 3.32 (*s*, 12H, OCH<sub>3</sub>). <sup>13</sup>C{<sup>1</sup>H} NMR(75 MHz, CDCl<sub>3</sub>): δ 157.3 (N=CH), 156.3 (COCH<sub>3</sub>), 140.0 (*ipso-C*), 121.6 (*o-C*), 114.7 (*m-C*), 55.0 (OCH<sub>3</sub>). Anal. Calcd for C<sub>30</sub>H<sub>30</sub>N<sub>4</sub>O<sub>4</sub>Sn: C, 57.26; H, 4.81; N, 8.90. Found: C, 57.20; H, 4.60; N, 8.90.

**[(((4-CF<sub>3</sub>)C<sub>6</sub>H<sub>4</sub>)N)<sub>2</sub>CH]<sub>2</sub>Sn (2c)** A pale yellow microcrystalline (83%). <sup>1</sup>H NMR (300 MHz, C<sub>6</sub>D<sub>6</sub>): δ 8.31 (*s*, 2H, N=CH), 7.28 (*d*, <sup>3</sup>J<sub>HH</sub> = 8.4 Hz, 8H, C<sub>6</sub>H<sub>4</sub>), 6.45 (*d*, <sup>3</sup>J<sub>HH</sub> = 8.0 Hz, 8H, C<sub>6</sub>H<sub>4</sub>). <sup>13</sup>C{<sup>1</sup>H} NMR (75 MHz, C<sub>6</sub>D<sub>6</sub>): δ 148.2 (N=CH), 129.3 (*ipso-C*), 126.6 (*o-C*), 125.7 (CCF<sub>3</sub>), 123.2 (CF<sub>3</sub>), 120.2 (*m-C*). Anal. Calcd for C<sub>30</sub>H<sub>18</sub>F<sub>12</sub>N<sub>4</sub>Sn: C, 46.13; H, 2.32; N, 7.17. Found: C, 46.23; H, 2.45; N, 7.14.

**[((2,6-Me<sub>2</sub>C<sub>6</sub>H<sub>3</sub>)N)<sub>2</sub>CH]<sub>2</sub>Sn (2d)** A colorless microcrystalline (99%). <sup>1</sup>H NMR (500 MHz, CDCl<sub>3</sub>): δ 8.30 (*s*, 2H, N=CH), 6.92 (*d*, <sup>3</sup>J<sub>HH</sub> = 7.4 Hz, 8H, *m*-C<sub>6</sub>H<sub>3</sub>), 6.84 (*t*, 4H, *p*-C<sub>6</sub>H<sub>3</sub>), 2.11 (*s*, 24H, CH<sub>3</sub>). <sup>13</sup>C{<sup>1</sup>H} NMR (125 MHz, CDCl<sub>3</sub>): δ 162.3 (N=CH), 144.6 (*ipso-C*), 132.2 (*o-C*), 128.1 (*m-C*), 123.4 (*p-C*), 19.3 (CH<sub>3</sub>). Anal. Calcd for C<sub>34</sub>H<sub>38</sub>N<sub>4</sub>Sn: C, 66.72; H, 6.16; N, 9.02. Found: C, 66.87; H, 5.94; N, 9.14.

**[((2,6-<sup>i</sup>Pr<sub>2</sub>C<sub>6</sub>H<sub>3</sub>)N)<sub>2</sub>CH]<sub>2</sub>Sn (2e)** A colorless microcrystalline (90%). <sup>1</sup>H NMR (300 MHz, C<sub>6</sub>D<sub>6</sub>): δ 8.06 (*s*, 2H, N=CH), 7.06 (*m*, 12H, C<sub>6</sub>H<sub>3</sub>), 3.50 (*sep*, <sup>3</sup>J<sub>HH</sub> = 6.7 Hz, 8H, CH(CH<sub>3</sub>)<sub>2</sub>), 1.12 (*m*, 48H, CH(CH<sub>3</sub>)<sub>2</sub>). <sup>13</sup>C{<sup>1</sup>H} NMR (75 MHz, C<sub>6</sub>D<sub>6</sub>): δ 163.0 (N=CH), 143.8 (*o-C*), 142.2 (*i-C*), 125.3 (*p-C*), 123.6 (*m-C*), 28.9 (CH(CH<sub>3</sub>)<sub>2</sub>), 23.9 (CH(CH<sub>3</sub>)<sub>2</sub>). Anal. Calcd for C<sub>50</sub>H<sub>70</sub>N<sub>4</sub>Sn: C, 71.00; H, 8.34; N, 6.62. Found: C, 71.27; H, 8.06; N, 6.54.

**Polymerization of  $\epsilon$ -caprolactone.** The following representative polymerization is for  $\epsilon$ -CL:**2e** molar ratio of 500:1. The amount of tin(II) complex can be adjusted accordingly for  $\epsilon$ -CL:Sn molar ratios of 10:1, 100:1, 1000:1, 5000:1 and 10000:1.

*Polymerization without the addition of benzyl alcohol:* Complex **2e** (0.100 g, 0.118 mmol, 1 equiv) and  $\epsilon$ -CL (6.743 g, 59.15 mmol, 500 equiv) were added to a Schlenk flask. The flask was then submerged with continuous stirring into a preheated oil bath at 110°C. After 2 min, the flask was taken out of the oil bath and then submerged into a cold water bath. A small amount of sample was taken for NMR analysis. The rest of the polymer was dissolved in CH<sub>2</sub>Cl<sub>2</sub> (20 mL) and precipitated with excess methanol. The solid polymer was collected and dried under vacuum.

*Polymerization with addition of benzyl alcohol:* The polymerization was carried out similarly as described above except that 1 equiv of benzyl alcohol was added to the reaction along with the tin complex and  $\epsilon$ -caprolactone.

**X-ray crystallography** The single crystal X-ray analyses were carried out at the Mahidol crystallographic facility. Diffraction measurements were made on a 4 K Bruker SMART<sup>3</sup> CCD area detector diffractometer using graphite-monochromated Mo  $K\alpha$  radiation ( $\lambda = 0.71073 \text{ \AA}$ ). The crystals were mounted in paratone oil and held in a low-temperature N<sub>2</sub> stream during data collection. Cell constants and an orientation matrix for data collection were obtained from a least-square refinement using the measured positions of reflections in the range  $4.14^\circ < 2\theta < 54.9^\circ$  for complex **2e**. The frame data were integrated by the program SAINT<sup>4</sup> and corrected for Lorentz and polarization effects. The structure was solved by the maXus crystallographic software package,<sup>5</sup> using direct methods (SIR97)<sup>6</sup> and refined by full-matrix least-squares

method on  $(F_{\text{obs}})^2$  using the SHELXTL-PC V 6.12 software package.<sup>7</sup> Note that, for complex **2e**, the methine carbons of the isopropyl groups (C7, C23, C32, and C48) are surrounded by methyl carbons with high thermal motion (*i.e.*, large thermal ellipsoids) resulting in lower  $U_{\text{eq}}$  values as compared to those of the surrounding carbons.

### References:

- 1) E. K. Kelly, D. E. Gary, P. Masood, R. Roland, *J. Am. Chem. Soc.* 2005, **127**, 4142- 4143.
- 2) C. D. Jr. Schaeffer, L. K. Myers, S. M. Coley, J. C. Otter, C. H. Yoder, *J. Chem. Educ.* 1990, **67**, 347-349.
- 3) *SMART v.5.6*, Bruker AXS Inc., Madison, WI, USA 2000.
- 4) *SAINTE v.4*, Siemens Analytical X-ray systems, Inc., Madison, WI, USA 1996.
- 5) S. Mackay, C. J. Gilmore, C. Edwards, N. Stewart and K. Shankland, *maXus Computer Program for the Solution and Refinement of Crystal Structures*, Bruker Nonius, The Netherlands, MacScience, Japan & The University of Glasgow.
- 6) A. Altomare, M. C. Burla, M. Camalli, G. Cascarano, C. Giacovazzo, A. Guagliardi, A. G. G. Moliterni, G. Polidori and R. Spagna, *J. App. Crystallogr.*, 1999, **32**, 115.
- 7) G. M. Sheldrick, *SHELXTL v.6.12*, Siemens Analytical X-ray Systems, Inc., Madison, WI, USA 1997.

**Table S1.** Experimental Details for X-ray Crystallography of complex **2e**.

|                                                                        | <b>2e</b>                                         |
|------------------------------------------------------------------------|---------------------------------------------------|
| empirical formula                                                      | C <sub>50</sub> H <sub>70</sub> N <sub>4</sub> Sn |
| FW                                                                     | 845.83                                            |
| cryst color, habit                                                     | Colorless, cube                                   |
| cryst system                                                           | monoclinic                                        |
| space group                                                            | <i>P2<sub>1</sub>/c</i>                           |
| <i>a</i> (Å)                                                           | 14.9195(4)                                        |
| <i>b</i> (Å)                                                           | 16.3981(5)                                        |
| <i>c</i> (Å)                                                           | 21.0942(6)                                        |
| $\alpha$ (deg)                                                         | 90                                                |
| $\beta$ (deg)                                                          | 110.127(2)                                        |
| $\gamma$ (deg)                                                         | 90                                                |
| volume (Å <sup>3</sup> )                                               | 4845.6(2)                                         |
| 2 $\theta$ range (deg)                                                 | 4.14 – 54.9                                       |
| Z                                                                      | 4                                                 |
| T/K                                                                    | 298                                               |
| D <sub>calc</sub> (g/cm <sup>3</sup> )                                 | 1.159                                             |
| $\mu$ (mm <sup>-1</sup> )                                              | 0.562                                             |
| no. of params refined                                                  | 10680                                             |
| refln/param ratio                                                      | 496                                               |
| final residuals <i>R</i> ; <i>R</i> <sub>all</sub> <sup><i>a</i></sup> | 5.54; 8.62                                        |
| goodness of fit indicator <sup><i>b</i></sup>                          | 1.047                                             |
| max. shift/error in final LS cycle                                     | 0                                                 |

<sup>*a*</sup>  $R = \Sigma | |F_o| - |F_c| | / \Sigma |F_o|$ . <sup>*b*</sup>  $GOF = [\Sigma w( |F_o| - |F_c| )^2 / (N_{obs} - N_{param})]^{1/2}$ .

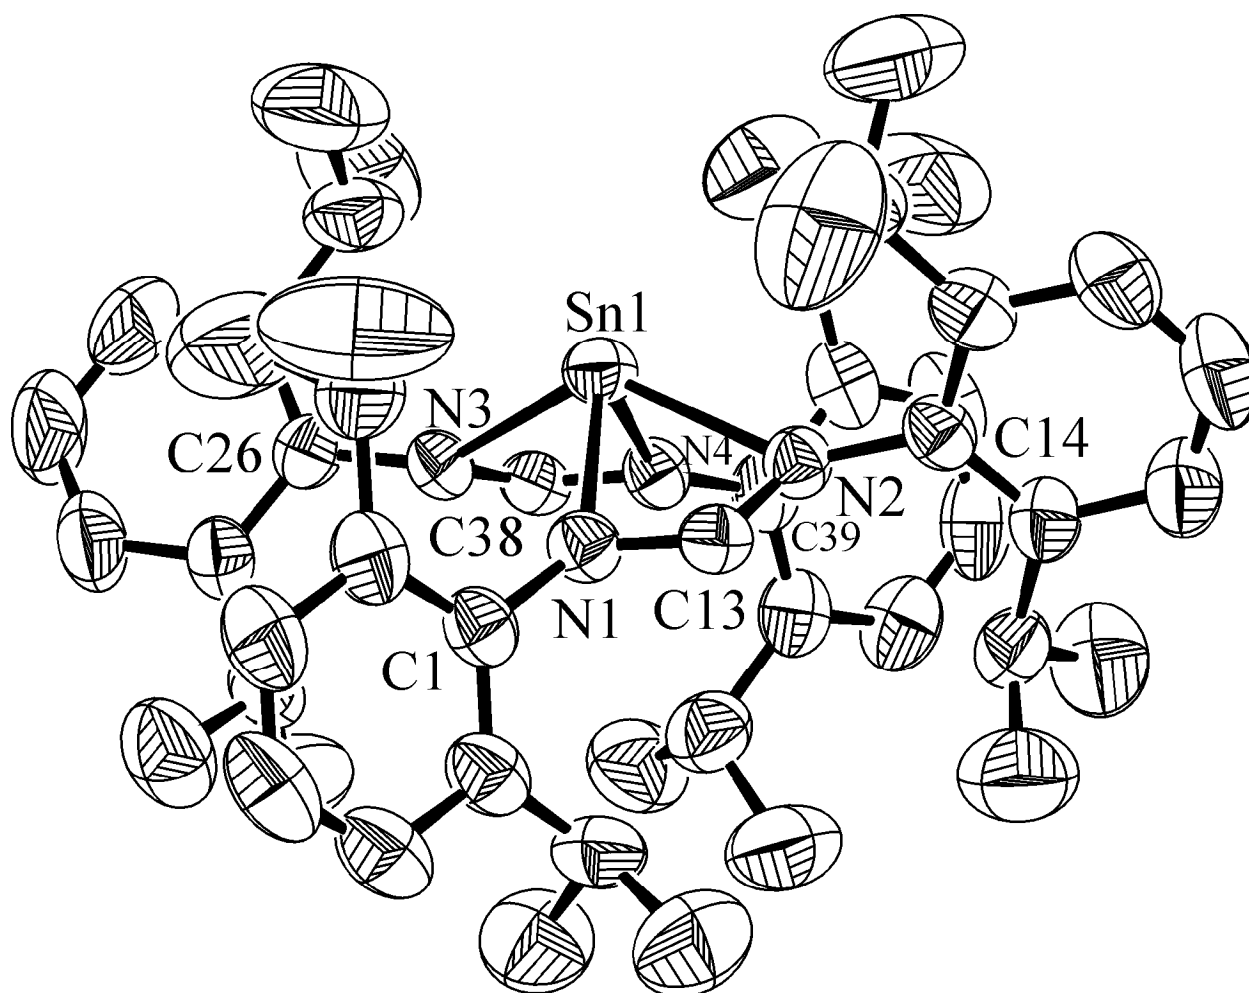

**Figure S1.** ORTEP drawing of complex **2e** with thermal ellipsoids drawn at 50% probability level. Hydrogen atoms are omitted for clarity.

Selected bond lengths (Å) and bond angles (°).

|           |          |           |          |           |          |
|-----------|----------|-----------|----------|-----------|----------|
| Sn1–N1    | 2.221(3) | Sn1–N4    | 2.241(3) | Sn1–N3    | 2.371(3) |
| Sn1–N2    | 2.379(3) | N2–C13    | 1.301(5) | N1–C13    | 1.321(5) |
| N4–C38    | 1.316(5) | N3–C38    | 1.304(5) |           |          |
| N1–Sn1–N4 | 102.4(1) | N1–Sn1–N3 | 92.7(1)  | N3–Sn1–N4 | 57.8(1)  |
| N1–Sn1–N2 | 57.9(1)  | N2–Sn1–N4 | 91.2(1)  | N2–Sn1–N3 | 133.2(1) |



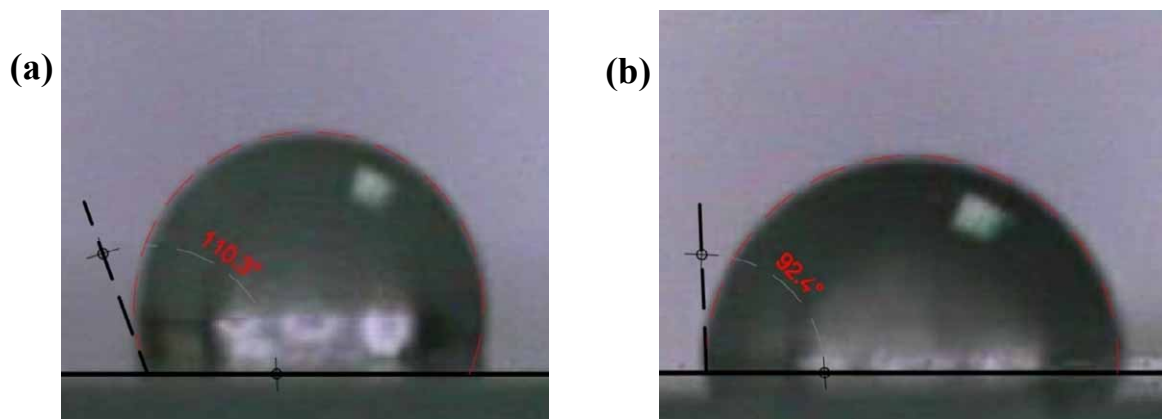

**Figure S2.** Water contact angle of poly( $\epsilon$ -caprolactone) synthesized from complex **2e** with  $\epsilon$ -CL:**2e** molar ratio of 500:1 (a) without the addition of BnOH and (b) with the addition of 1equiv of BnOH.

**Table S2.** Water contact angles of poly( $\epsilon$ -caprolactone) synthesized from complex **2e** with  $\epsilon$ -CL:**2e** molar ratio of 500:1.

**No BnOH**

| Run            | Degree (°)   |
|----------------|--------------|
| 1              | 104.5        |
| 2              | 105.0        |
| 3              | 107.9        |
| 4              | 110.3        |
| 5              | 109.1        |
| <b>Average</b> | <b>107.4</b> |
| <b>SD</b>      | <b>2.5</b>   |

**Add 1 equiv of BnOH**

| Run            | Degree (°)  |
|----------------|-------------|
| 1              | 93.5        |
| 2              | 92.4        |
| 3              | 92.6        |
| <b>Average</b> | <b>92.8</b> |
| <b>SD</b>      | <b>0.6</b>  |

Mass spectrum of the polymerization of  $\epsilon$ -CL at 110°C for 1 min using  $\epsilon$ -CL:2e = 10:1.

The repeating major mass is assigned to cyclic  $[\epsilon\text{-CL}]_n + \text{Na}^+$ . The peaks with much lower intensities observed at 1600-2200 Dalton (e.g. 1753.3, 1867.2, 1981.4, 2098.5, 2209.5) are assigned to linear  $\text{H}[\text{CL}]_n\text{OH} + \text{Na}^+$ .

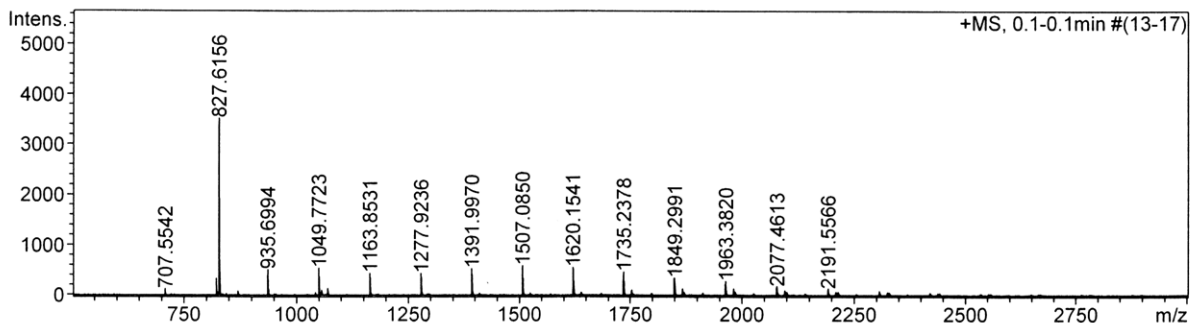

| #  | m/z       | Res. | S/N    | I    | FWHM   |
|----|-----------|------|--------|------|--------|
| 1  | 821.6324  | 8184 | 309.7  | 337  | 0.1004 |
| 2  | 827.6156  | 8295 | 3210.3 | 3517 | 0.0998 |
| 3  | 828.6157  | 8348 | 1757.1 | 1928 | 0.0993 |
| 4  | 829.6175  | 7826 | 631.9  | 694  | 0.1060 |
| 5  | 830.6162  | 8729 | 194.7  | 214  | 0.0952 |
| 6  | 935.6994  | 8050 | 404.8  | 511  | 0.1162 |
| 7  | 936.7051  | 8324 | 240.9  | 305  | 0.1125 |
| 8  | 1049.7723 | 8959 | 431.8  | 543  | 0.1172 |
| 9  | 1050.7762 | 9209 | 292.1  | 367  | 0.1141 |
| 10 | 1163.8531 | 7893 | 375.0  | 441  | 0.1475 |
| 11 | 1164.8476 | 7866 | 293.5  | 345  | 0.1481 |
| 12 | 1277.9236 | 7643 | 371.1  | 437  | 0.1672 |
| 13 | 1278.9332 | 8144 | 301.1  | 355  | 0.1570 |
| 14 | 1391.9970 | 8302 | 407.7  | 531  | 0.1677 |
| 15 | 1393.0029 | 7422 | 317.8  | 415  | 0.1877 |
| 16 | 1394.0090 | 8383 | 177.4  | 232  | 0.1663 |
| 17 | 1506.0758 | 7883 | 391.8  | 559  | 0.1911 |
| 18 | 1507.0850 | 8309 | 413.8  | 591  | 0.1814 |
| 19 | 1508.0888 | 9457 | 233.7  | 334  | 0.1595 |
| 20 | 1620.1541 | 7596 | 360.7  | 553  | 0.2133 |
| 21 | 1621.1597 | 7725 | 339.1  | 521  | 0.2099 |
| 22 | 1622.1547 | 7828 | 187.9  | 289  | 0.2072 |
| 23 | 1734.2371 | 7872 | 255.6  | 420  | 0.2203 |
| 24 | 1735.2378 | 7809 | 283.3  | 465  | 0.2222 |
| 25 | 1736.2283 | 7713 | 161.9  | 266  | 0.2251 |
| 26 | 1848.3129 | 8333 | 209.6  | 347  | 0.2218 |
| 27 | 1849.2991 | 7246 | 209.9  | 348  | 0.2552 |
| 28 | 1850.3221 | 9592 | 161.1  | 267  | 0.1929 |
| 29 | 1962.3830 | 7437 | 139.4  | 229  | 0.2639 |
| 30 | 1963.3820 | 8397 | 169.2  | 278  | 0.2338 |

## Sample Information

|                |                         |                |        |
|----------------|-------------------------|----------------|--------|
| <b>ID</b>      | Am-H+BnOH 1_500         | <b>Flow</b>    | 1.0000 |
| <b>Method</b>  | Conventional            | <b>Inj Vol</b> | 100.0  |
| <b>Acq.</b>    | Sep 08, 2009 - 22:12:44 | <b>Col</b>     | 35.00  |
| <b>Solvent</b> | THF                     | <b>Det</b>     | 35.00  |

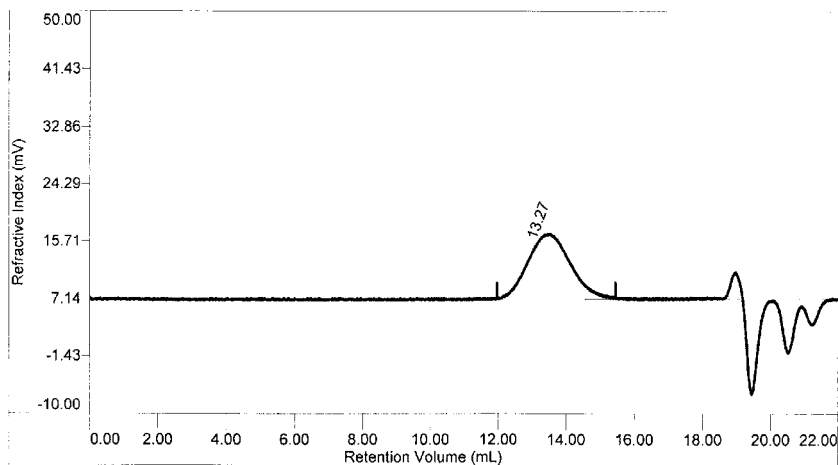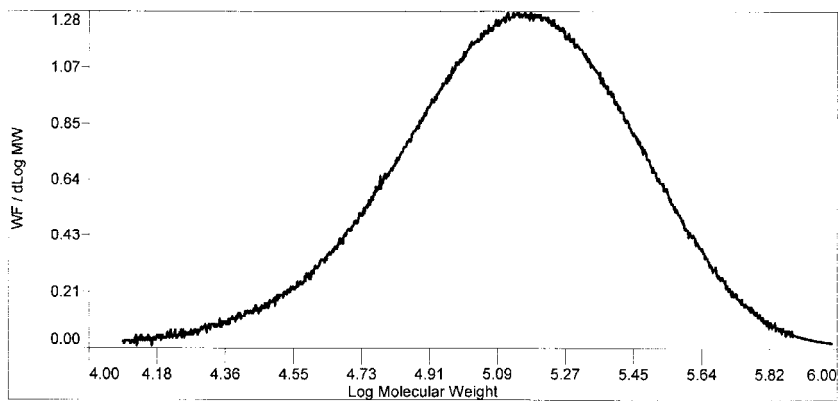

| Sample                        | Mn      | Mw      | Mp      | Mz      | Mw/Mn |
|-------------------------------|---------|---------|---------|---------|-------|
| 08-09-2009_22:12:44_Am-H+BnOH | 101,593 | 172,932 | 189,090 | 265,905 | 1.702 |

**OmniSEC** [www.viscotek.com](http://www.viscotek.com)

**Table 1, Entry 1.**

## Sample Information

|                |                         |                |        |
|----------------|-------------------------|----------------|--------|
| <b>ID</b>      | Am-OMe+BnOH 1_500       | <b>Flow</b>    | 1.0000 |
| <b>Method</b>  | Conventional            | <b>Inj Vol</b> | 100.0  |
| <b>Acq.</b>    | Sep 08, 2009 - 23:08:17 | <b>Col</b>     | 35.00  |
| <b>Solvent</b> | THF                     | <b>Det</b>     | 35.00  |

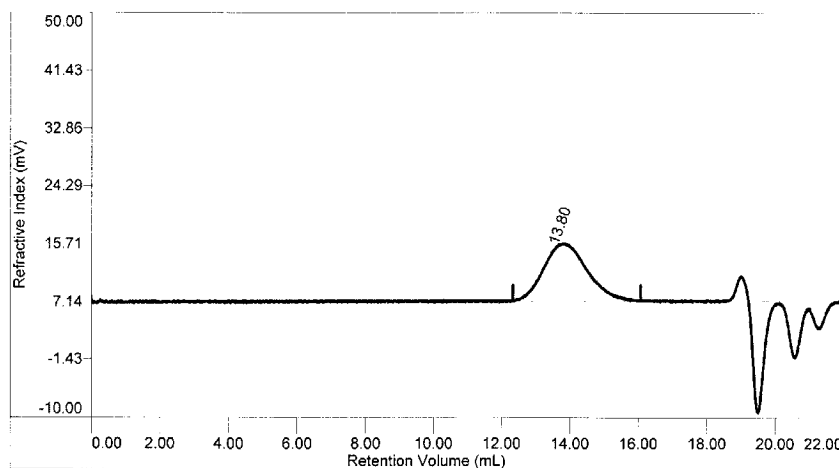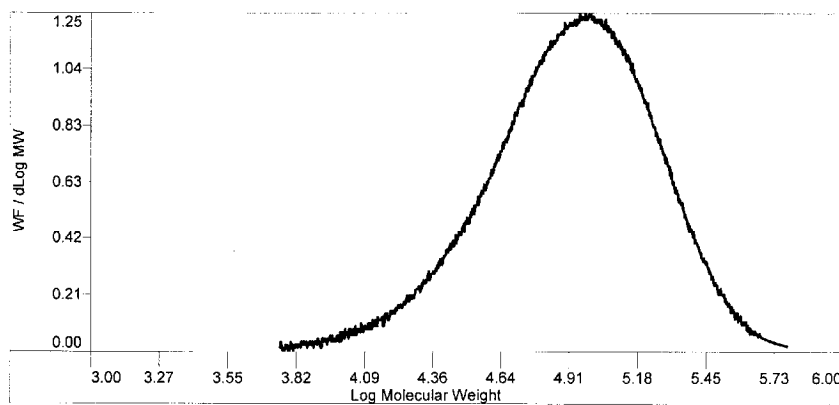

| Sample                       | Mn     | Mw      | Mp     | Mz      | Mw/Mn |
|------------------------------|--------|---------|--------|---------|-------|
| 08-09-2009_23:08:17_Am-OMe+B | 60,224 | 107,708 | 97,616 | 167,510 | 1.788 |

**OmniSEC** [www.viscotek.com](http://www.viscotek.com)

**Table 1, Entry 2.**

## Sample Information

|                |                         |                |        |
|----------------|-------------------------|----------------|--------|
| <b>ID</b>      | Am-CF3+BnOH 1_500       | <b>Flow</b>    | 1.0000 |
| <b>Method</b>  | Conventional            | <b>Inj Vol</b> | 100.0  |
| <b>Acq.</b>    | Sep 09, 2009 - 00:03:49 | <b>Col</b>     | 35.00  |
| <b>Solvent</b> | THF                     | <b>Det</b>     | 35.00  |

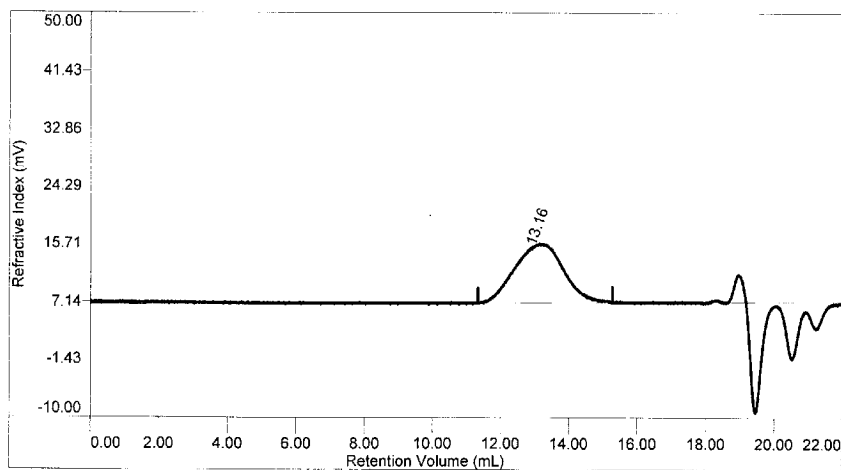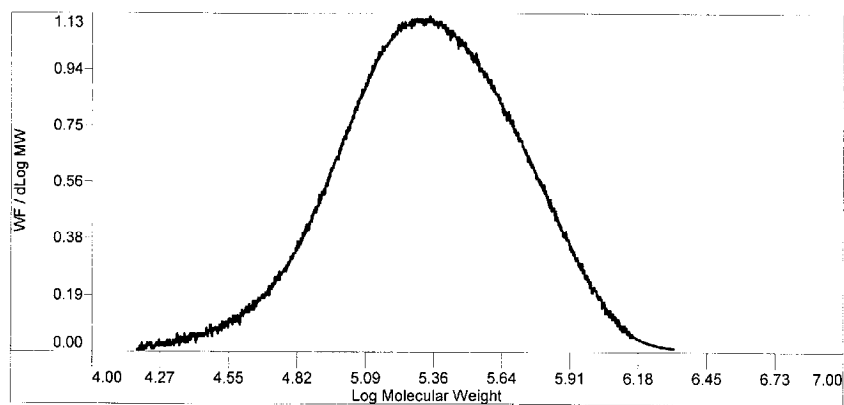

| Sample                        | Mn      | Mw      | Mp      | Mz      | Mw/Mn |
|-------------------------------|---------|---------|---------|---------|-------|
| 09-09-2009_00:03:49_Am-CF3+Br | 157,923 | 300,214 | 217,885 | 511,631 | 1.901 |

**OmniSEC** [www.viscotek.com](http://www.viscotek.com)

**Table 1, Entry 3.**

## Sample Information

|                |                         |                |        |
|----------------|-------------------------|----------------|--------|
| <b>ID</b>      | Am-CH3+BnOH 1_500       | <b>Flow</b>    | 1.0000 |
| <b>Method</b>  | Conventional            | <b>Inj Vol</b> | 100.0  |
| <b>Acq.</b>    | Sep 08, 2009 - 21:17:11 | <b>Col</b>     | 35.00  |
| <b>Solvent</b> | THF                     | <b>Det</b>     | 35.00  |

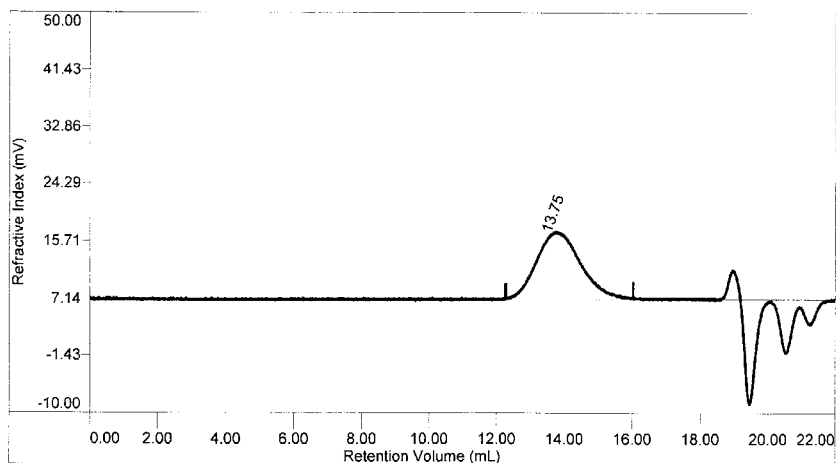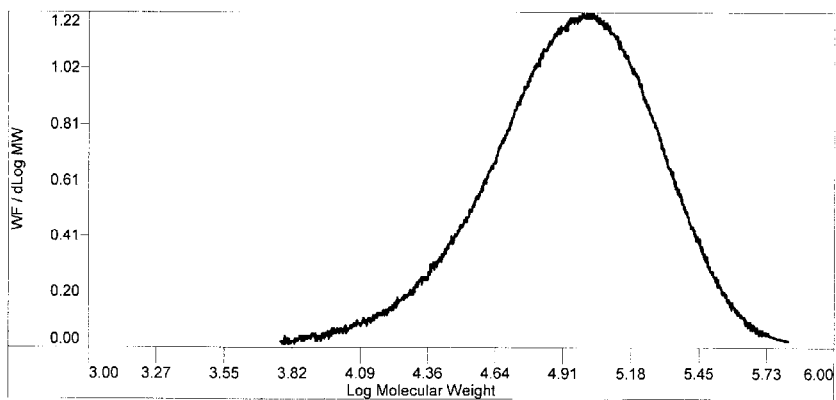

| Sample                        | Mn     | Mw      | Mp      | Mz      | Mw/Mn |
|-------------------------------|--------|---------|---------|---------|-------|
| 08-09-2009_21:17:11_Am-CH3+Br | 62,004 | 114,263 | 103,932 | 180,690 | 1.843 |

**OmniSEC** [www.viscotek.com](http://www.viscotek.com)

**Table 1, Entry 4.**

## Sample Information

|                |                         |                |        |
|----------------|-------------------------|----------------|--------|
| <b>ID</b>      | Am-iPr+BnOH 1_500       | <b>Flow</b>    | 1.0000 |
| <b>Method</b>  | Conventional            | <b>Inj Vol</b> | 100.0  |
| <b>Acq.</b>    | Sep 08, 2009 - 20:21:39 | <b>Col</b>     | 35.00  |
| <b>Solvent</b> | THF                     | <b>Det</b>     | 35.00  |

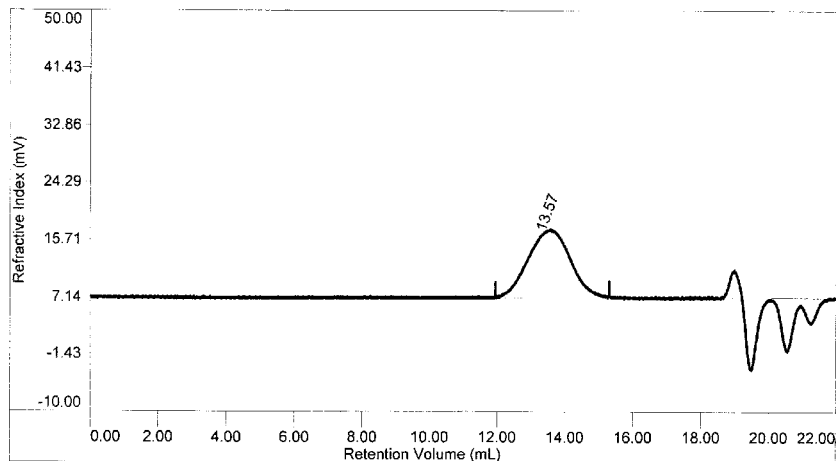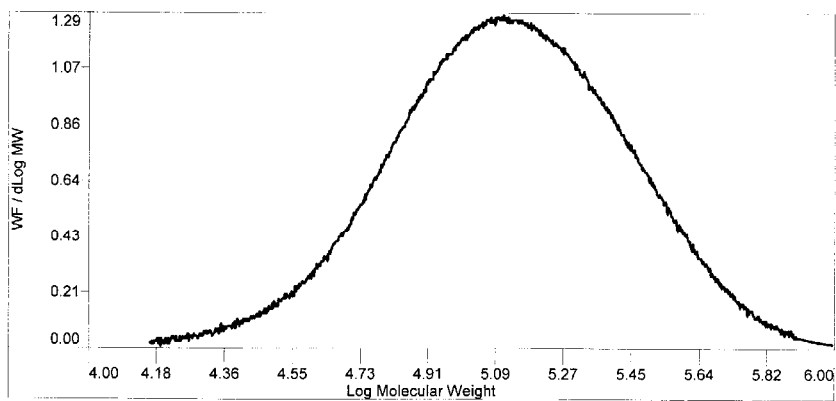

| Sample                         | Mn      | Mw      | Mp      | Mz      | Mw/Mn |
|--------------------------------|---------|---------|---------|---------|-------|
| 08-09-2009_20:21:39_Am-iPr+BnC | 103,645 | 170,502 | 130,361 | 265,040 | 1.645 |

**OmniSEC** [www.viscotek.com](http://www.viscotek.com)

**Table 1, Entry 5.**

## Sample Information

|                |                         |                |        |
|----------------|-------------------------|----------------|--------|
| <b>ID</b>      | Am-H 1_500              | <b>Flow</b>    | 1.0000 |
| <b>Method</b>  | Conventional            | <b>Inj Vol</b> | 100.0  |
| <b>Acq.</b>    | Sep 08, 2009 - 17:35:01 | <b>Col</b>     | 35.00  |
| <b>Solvent</b> | THF                     | <b>Det</b>     | 35.00  |

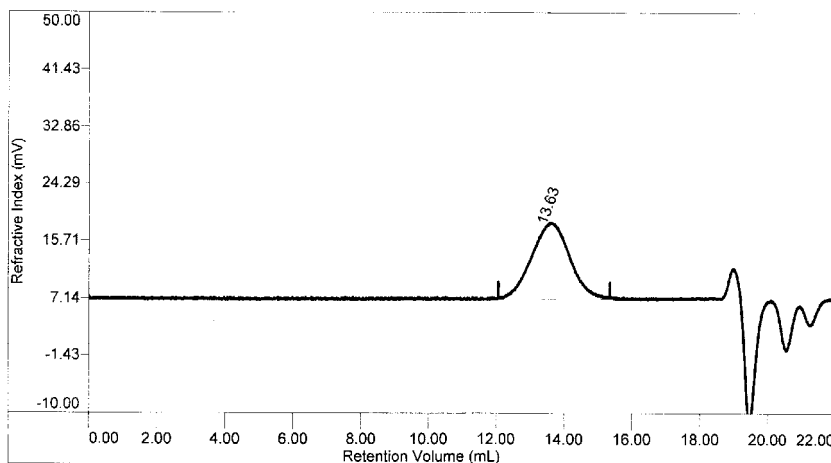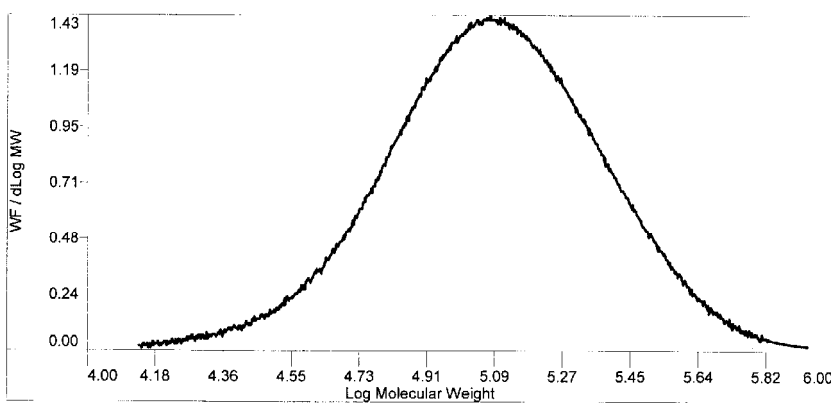

| Sample                        | Mn     | Mw      | Mp      | Mz      | Mw/Mn |
|-------------------------------|--------|---------|---------|---------|-------|
| 08-09-2009_17:35:01_Am-H_1_50 | 97,455 | 151,300 | 120,649 | 225,604 | 1.553 |

**OmniSEC** [www.viscotek.com](http://www.viscotek.com)

**Table 1, Entry 6.**



## Sample Information

|                |                         |                |        |
|----------------|-------------------------|----------------|--------|
| <b>ID</b>      | Am-OMe 1_500            | <b>Flow</b>    | 1.0000 |
| <b>Method</b>  | Conventional            | <b>Inj Vol</b> | 100.0  |
| <b>Acq.</b>    | Sep 08, 2009 - 18:30:33 | <b>Col</b>     | 35.00  |
| <b>Solvent</b> | THF                     | <b>Det</b>     | 35.00  |

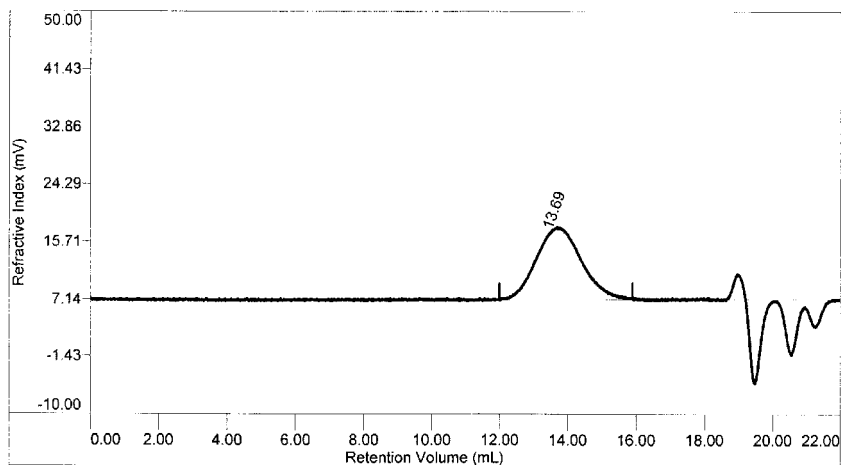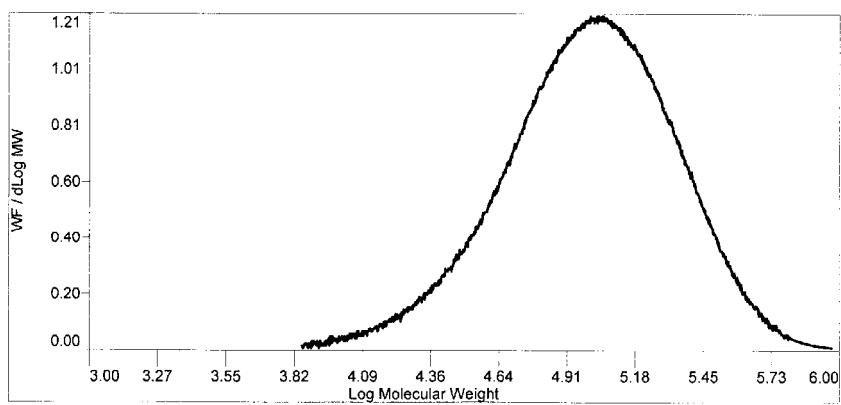

| Sample                       | Mn     | Mw      | Mp      | Mz      | Mw/Mn |
|------------------------------|--------|---------|---------|---------|-------|
| 08-09-2009_18:30:33_Am-OMe_1 | 71,426 | 132,225 | 112,153 | 216,549 | 1.851 |

**OmniSEC** [www.viscotek.com](http://www.viscotek.com)

**Table 1, Entry 7.**

## Sample Information

|                |                         |                |        |
|----------------|-------------------------|----------------|--------|
| <b>ID</b>      | Am-CF3_1_500            | <b>Flow</b>    | 1.0000 |
| <b>Method</b>  | Conventional            | <b>Inj Vol</b> | 100.0  |
| <b>Acq.</b>    | Sep 08, 2009 - 19:26:06 | <b>Col</b>     | 35.00  |
| <b>Solvent</b> | THF                     | <b>Det</b>     | 35.00  |

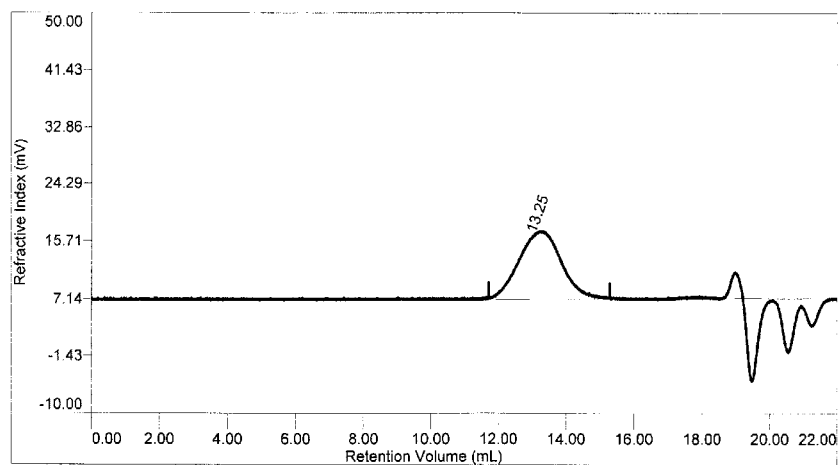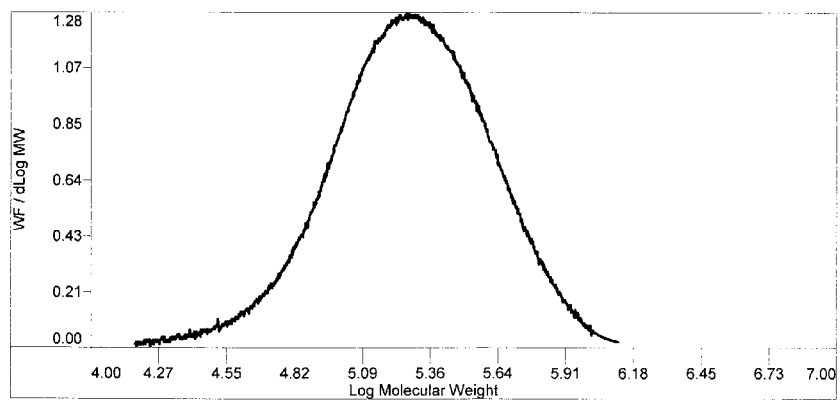

| Sample                       | Mn      | Mw      | Mp      | Mz      | Mw/Mn |
|------------------------------|---------|---------|---------|---------|-------|
| 08-09-2009_19:26:06_Am-CF3_1 | 145,802 | 245,882 | 194,239 | 379,466 | 1.686 |

**OmniSEC** [www.viscotek.com](http://www.viscotek.com)

**Table 1, Entry 8.**

## Sample Information

|                |                         |                |        |
|----------------|-------------------------|----------------|--------|
| <b>ID</b>      | Am-CH3 1_500            | <b>Flow</b>    | 1.0000 |
| <b>Method</b>  | Conventional            | <b>Inj Vol</b> | 100.0  |
| <b>Acq.</b>    | Sep 08, 2009 - 16:39:28 | <b>Col</b>     | 35.00  |
| <b>Solvent</b> | THF                     | <b>Det</b>     | 35.00  |

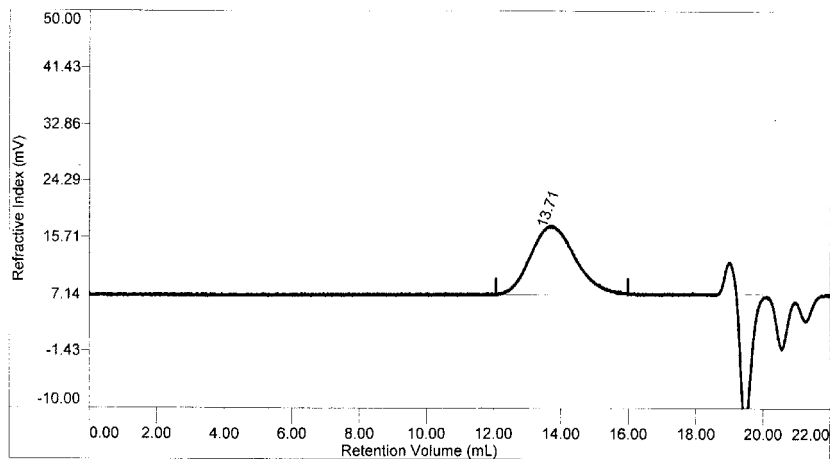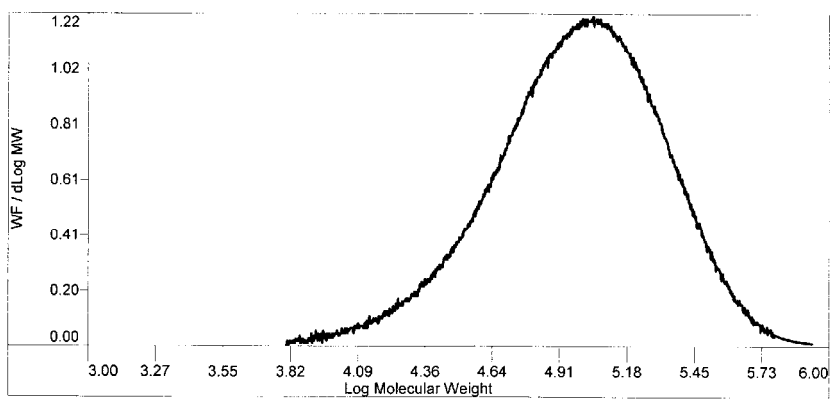

| Sample                       | Mn     | Mw      | Mp      | Mz      | Mw/Mn |
|------------------------------|--------|---------|---------|---------|-------|
| 08-09-2009_16:39:28_Am-CH3_1 | 68,555 | 126,807 | 109,834 | 204,133 | 1.850 |

**OmniSEC** [www.viscotek.com](http://www.viscotek.com)

**Table 1, Entry 9.**

## Sample Information

|                |                         |                |        |
|----------------|-------------------------|----------------|--------|
| <b>ID</b>      | Am-iPr 1_500            | <b>Flow</b>    | 1.0000 |
| <b>Method</b>  | Conventional            | <b>Inj Vol</b> | 100.0  |
| <b>Acq.</b>    | Sep 08, 2009 - 12:01:45 | <b>Col</b>     | 35.00  |
| <b>Solvent</b> | THF                     | <b>Det</b>     | 35.00  |

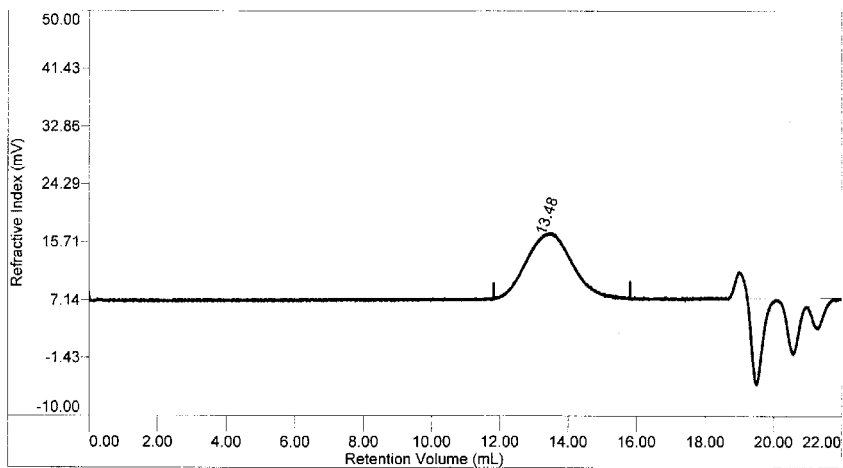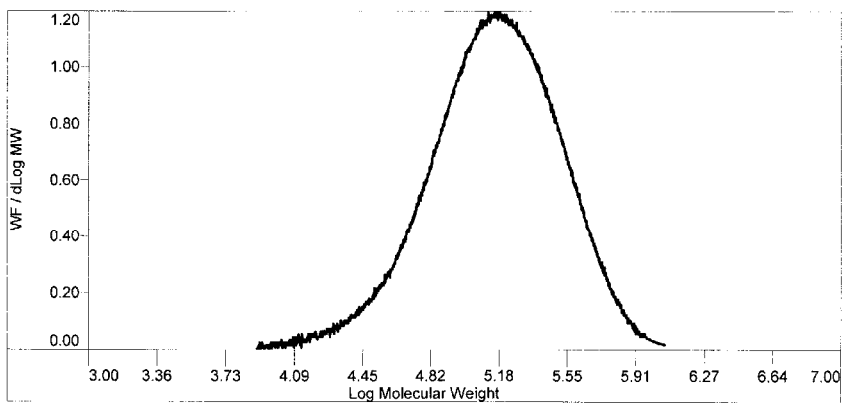

| Sample                         | Mn      | Mw      | Mp      | Mz      | Mw/Mn |
|--------------------------------|---------|---------|---------|---------|-------|
| 08-09-2009_12:01:45_Am-iPr_1_5 | 102,634 | 190,278 | 146,184 | 307,217 | 1.854 |

**OmniSEC** [www.viscotek.com](http://www.viscotek.com)

**Table 1, Entry 10.**

## Sample Information

|                |                         |                |        |
|----------------|-------------------------|----------------|--------|
| <b>ID</b>      | Am-iPr 1_1000           | <b>Flow</b>    | 1.0000 |
| <b>Method</b>  | Conventional            | <b>Inj Vol</b> | 100.0  |
| <b>Acq.</b>    | Sep 08, 2009 - 12:57:17 | <b>Col</b>     | 35.00  |
| <b>Solvent</b> | THF                     | <b>Det</b>     | 35.00  |

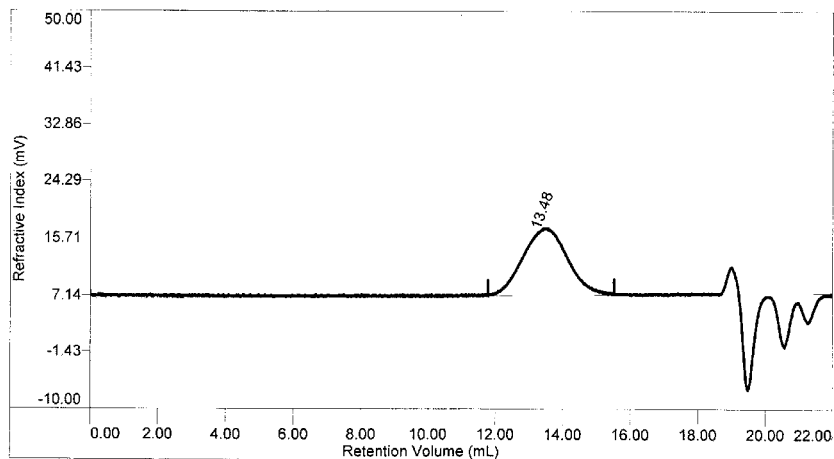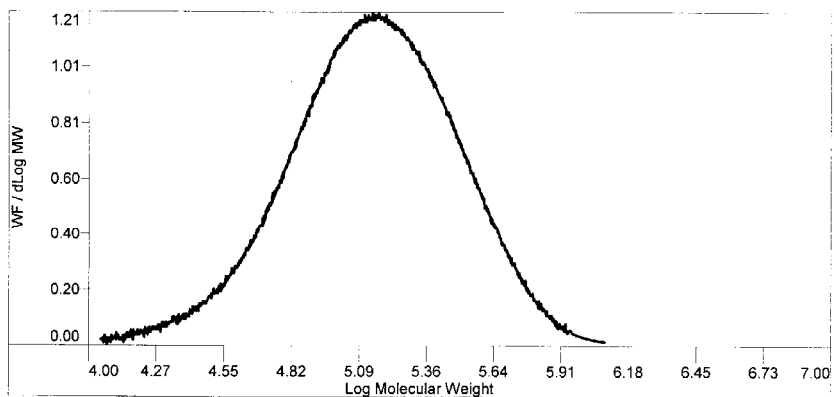

| Sample                         | Mn      | Mw      | Mp      | Mz      | Mw/Mn |
|--------------------------------|---------|---------|---------|---------|-------|
| 08-09-2009_12:57:17_Am-iPr_1_1 | 103,121 | 185,582 | 145,931 | 302,822 | 1.800 |

**OmniSEC** [www.viscotek.com](http://www.viscotek.com)

**Table 1, Entry 11.**

## Sample Information

|                |                         |                |        |
|----------------|-------------------------|----------------|--------|
| <b>ID</b>      | Am-iPr 1_5000           | <b>Flow</b>    | 1.0000 |
| <b>Method</b>  | Conventional            | <b>Inj Vol</b> | 100.0  |
| <b>Acq.</b>    | Sep 08, 2009 - 13:52:50 | <b>Col</b>     | 35.00  |
| <b>Solvent</b> | THF                     | <b>Det</b>     | 35.00  |

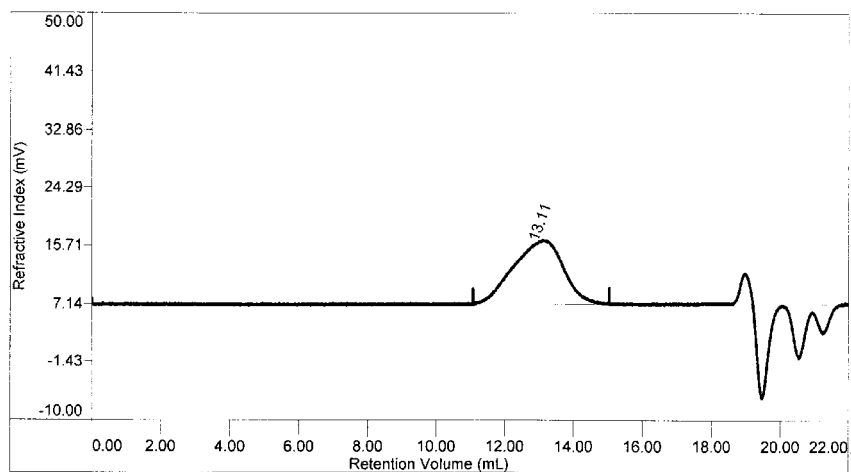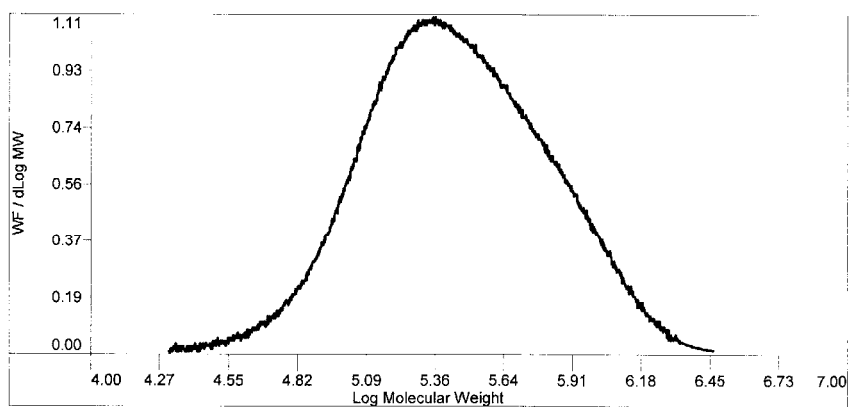

| Sample                         | Mn      | Mw      | Mp      | Mz      | Mw/Mn |
|--------------------------------|---------|---------|---------|---------|-------|
| 08-09-2009_13:52:50_Am-iPr_1_5 | 202,045 | 392,610 | 230,151 | 712,476 | 1.943 |

**OmniSEC** [www.viscotek.com](http://www.viscotek.com)

Table 1, Entry 12.

## Sample Information

|                |                         |                |        |
|----------------|-------------------------|----------------|--------|
| <b>ID</b>      | Am-iPr 1_10000          | <b>Flow</b>    | 1.0000 |
| <b>Method</b>  | Conventional            | <b>Inj Vol</b> | 100.0  |
| <b>Acq.</b>    | Sep 08, 2009 - 14:48:22 | <b>Col</b>     | 35.00  |
| <b>Solvent</b> | THF                     | <b>Det</b>     | 35.00  |

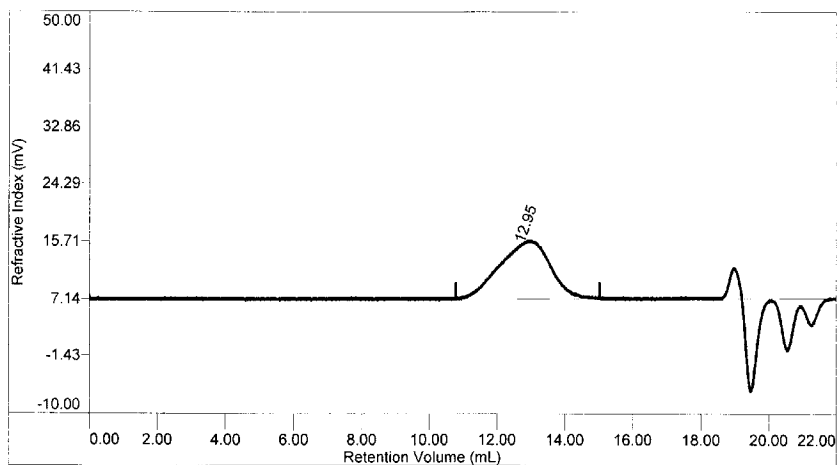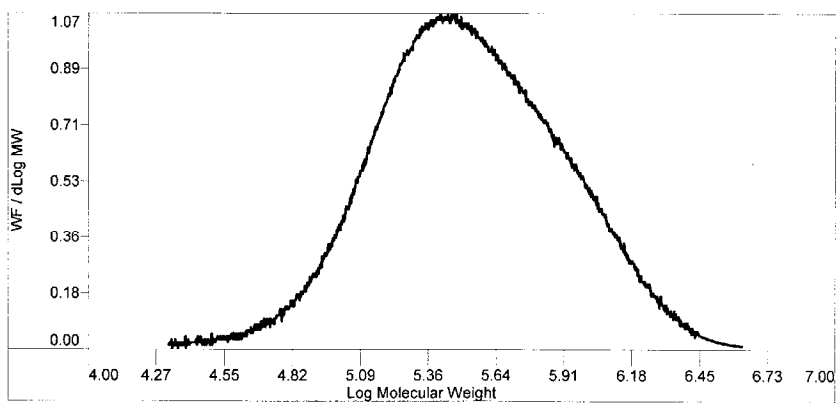

| Sample                         | Mn      | Mw      | Mp      | Mz      | Mw/Mn |
|--------------------------------|---------|---------|---------|---------|-------|
| 08-09-2009_14:48:22_Am-iPr_1_1 | 236,166 | 489,442 | 284,205 | 942,472 | 2.072 |

**OmniSEC** [www.viscotek.com](http://www.viscotek.com)

**Table 1, Entry 13.**

## Sample Information

|                |                         |                |        |
|----------------|-------------------------|----------------|--------|
| <b>ID</b>      | M-Sn(Oct)               | <b>Flow</b>    | 1.0000 |
| <b>Method</b>  | Conventional            | <b>Inj Vol</b> | 100.0  |
| <b>Acq.</b>    | Sep 08, 2009 - 15:43:55 | <b>Col</b>     | 35.00  |
| <b>Solvent</b> | THF                     | <b>Det</b>     | 35.00  |

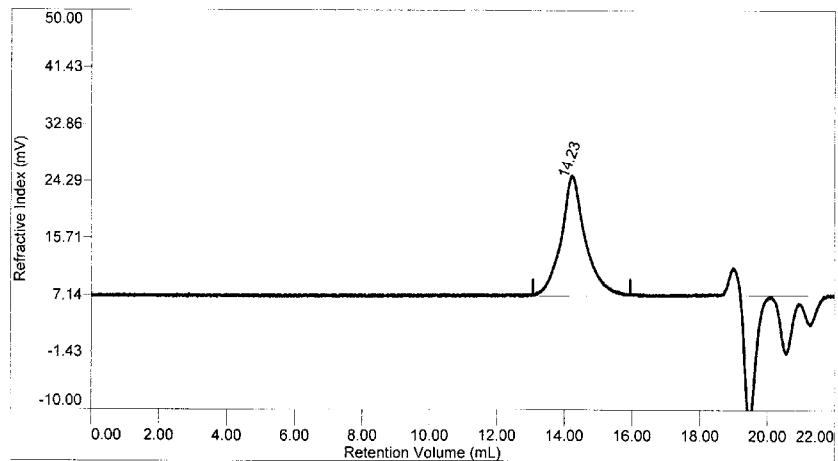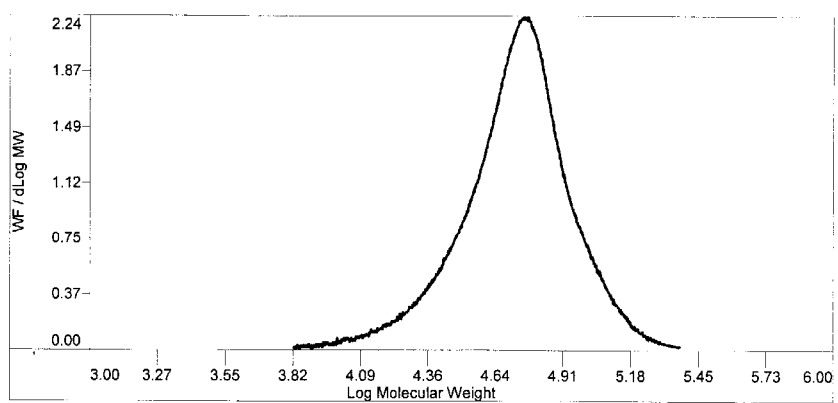

| Sample                        | Mn     | Mw     | Mp     | Mz     | Mw/Mn |
|-------------------------------|--------|--------|--------|--------|-------|
| 08-09-2009_15:43:55_M-Sn(Oct) | 45,087 | 59,288 | 56,991 | 74,702 | 1.315 |

**OmniSEC** [www.viscotek.com](http://www.viscotek.com)

**Table 1, Entry 14.**
